# Supplementary material
Source: Copernicus journal article supplement (doi:10.5194/bg-23-3871-2026)
Supplement: Supplementary file 1 [file bg-23-3871-2026-supplement.pdf]

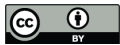

*Supplement of*

**Understanding the resilient carbon cycle response to the 2014–2015 Blob event in the Gulf of Alaska using a regional ocean biogeochemical model**

**Yumi Abe et al.**

*Correspondence to:* Yumi Abe ([yumiabe@gatech.edu](mailto:yumiabe@gatech.edu))

The copyright of individual parts of the supplement might differ from the article licence.

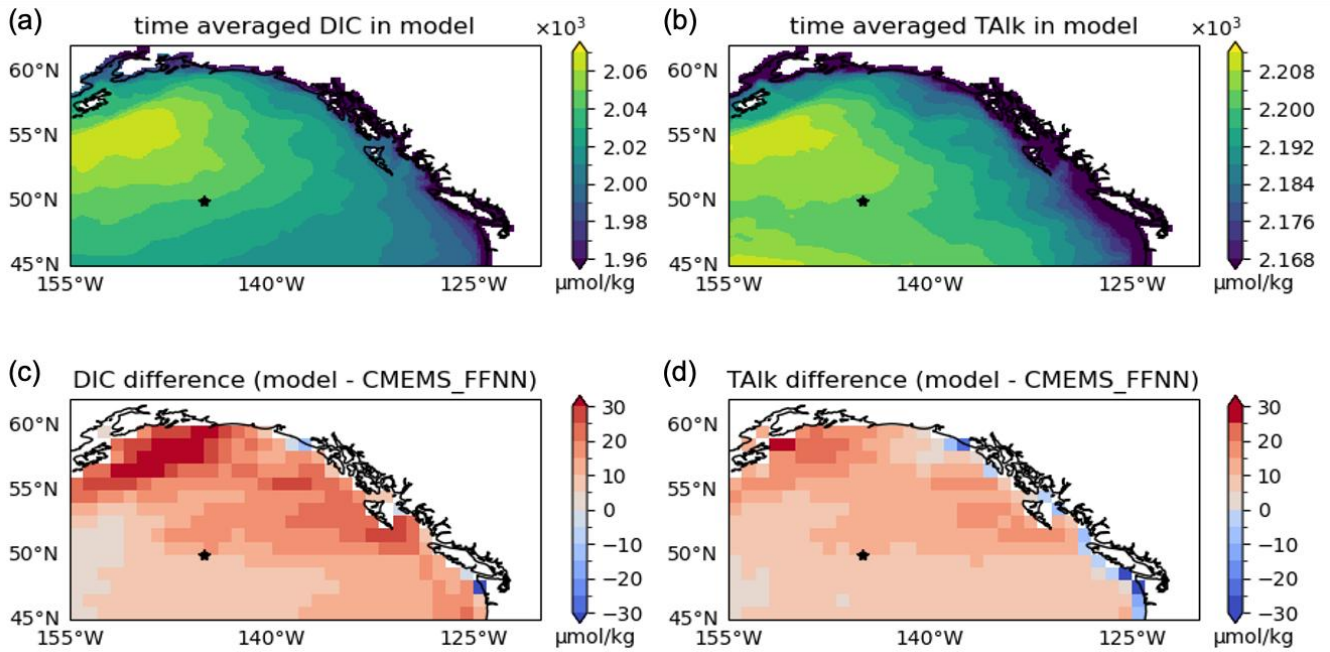

Figure S1: Comparison of surface distributions of (a, c) DIC and (b, d) TALK, averaged over 2010–2017, between the model and CMEMS\_FFNN, one of the SeaFlux products. The star in each panel indicates the location of OSP.

5

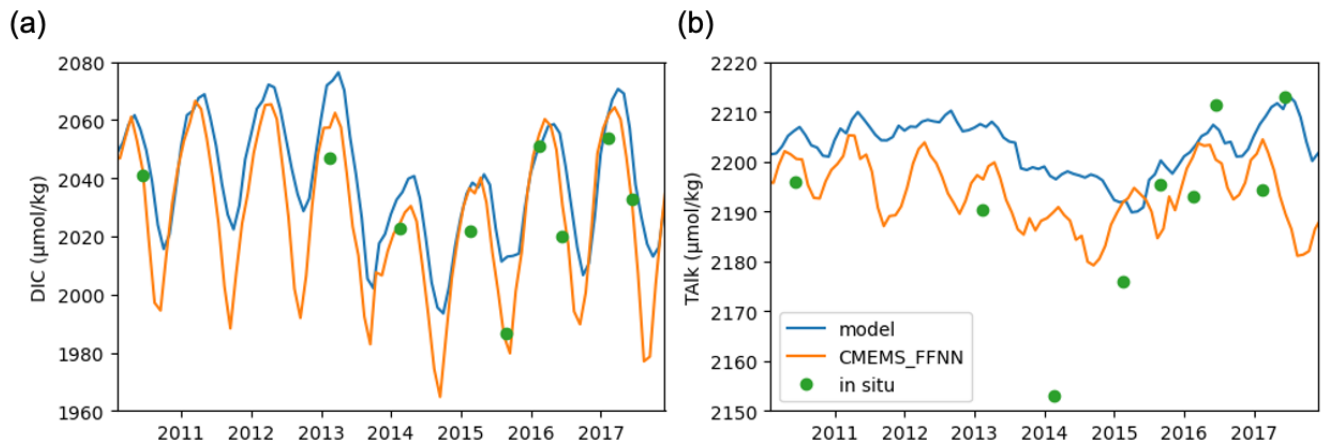

Figure S2: Comparison of the time series of surface (a) DIC and (b) TALK at OSP between the model and CMEMS-FFNN, one of the SeaFlux datasets. Green dots in both panels represent in situ observations (Franco et al. 2021) averaged over the upper 10 m depth.

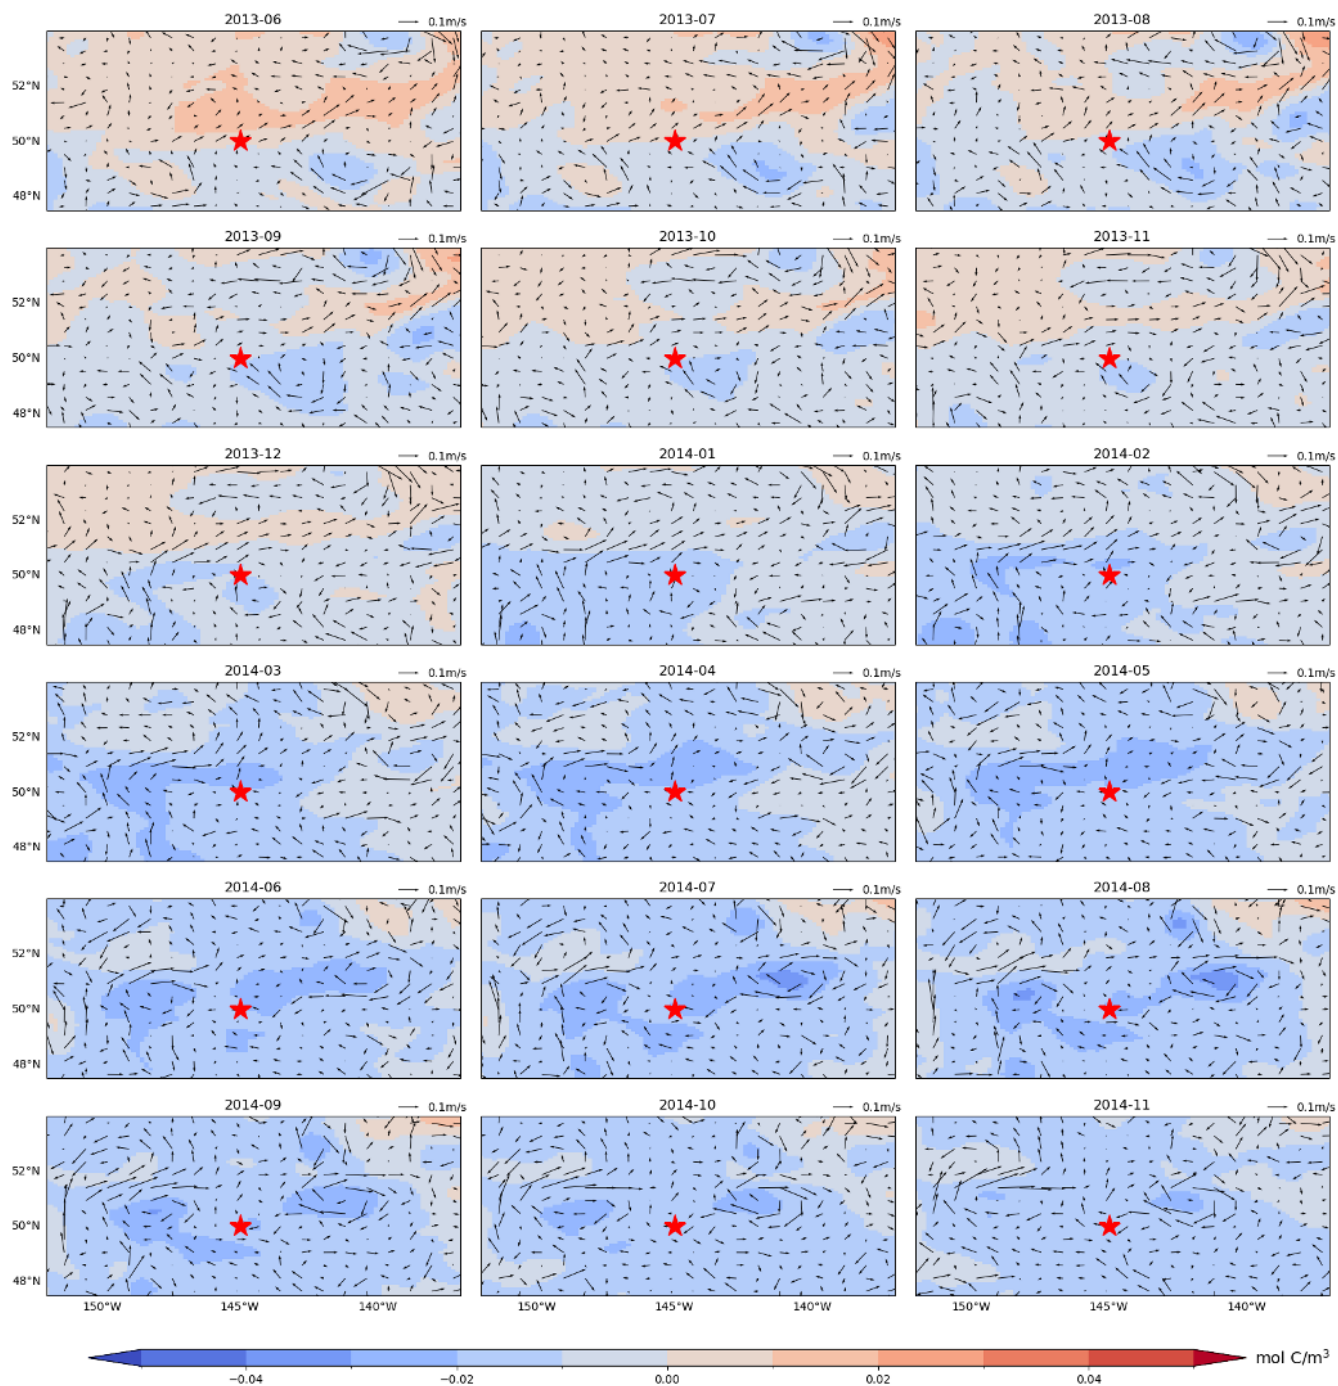

10

**Figure S3: Surface velocity (vectors) and DIC (colored shading) anomalies relative to 2010–2017, from June 2013 to November 2014. All variables have been detrended and deseasonalized. Velocities are smoothed using a 3-month moving average. The red star indicates the location of OSP.**

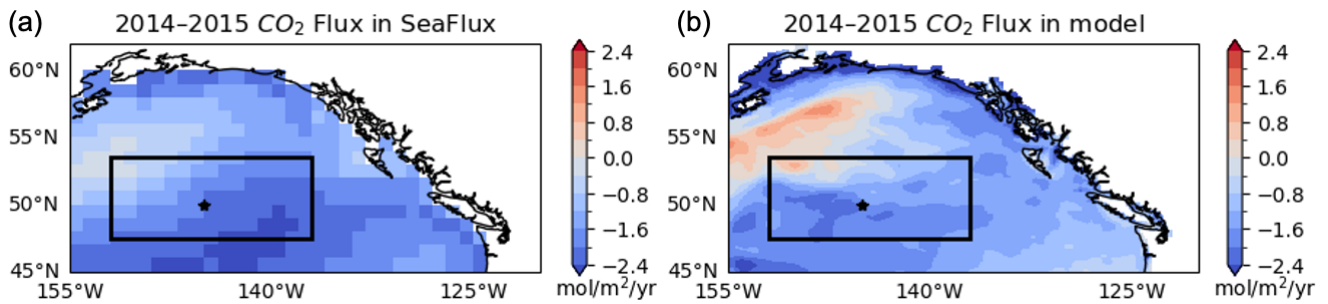

15 **Figure S4: Comparison of the spatial distributions of annual CO<sub>2</sub> Fluxes averaged over 2014–2015 for (a) the ensemble mean of the SeaFlux products and (b) the model. Negative values indicate oceanic CO<sub>2</sub> uptake. The star in each panel marks the location of OSP. The black box (47.5–53.5°N, 208–223°E) in (b) indicates the central GOA area, same as in Fig. 7.**

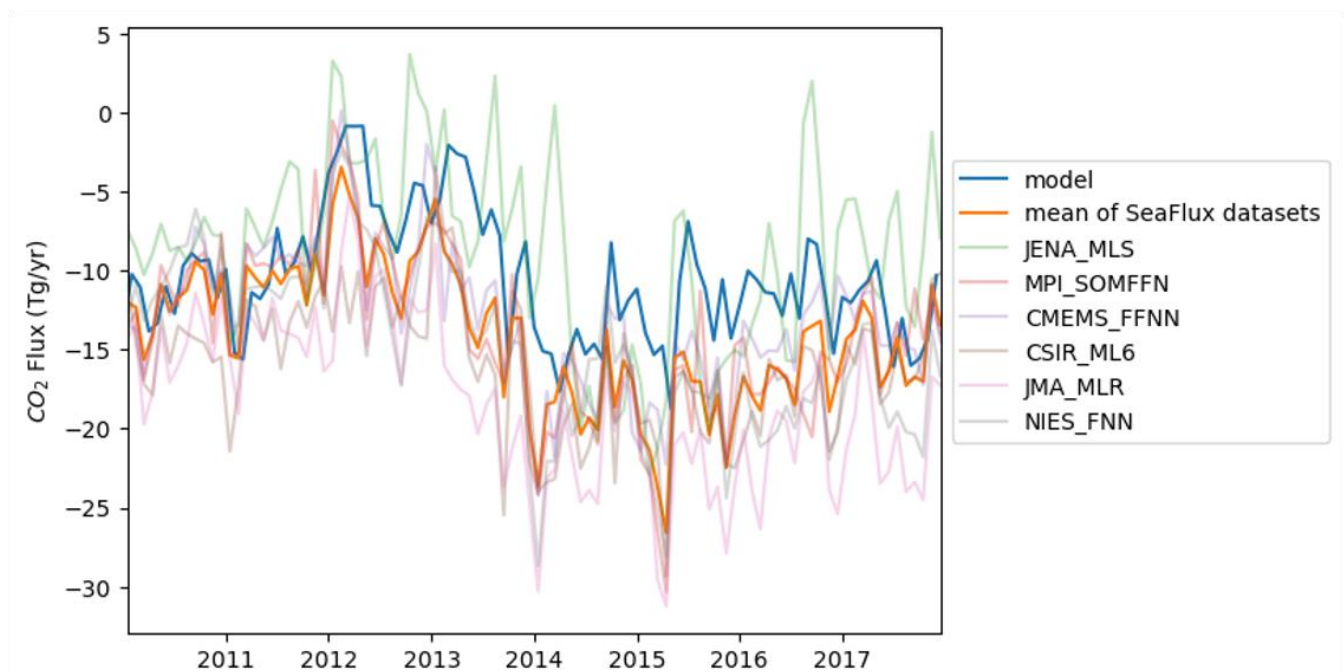

20 **Figure S5: Time series of integrated CO<sub>2</sub> Flux over the central GOA. The SeaFlux ensemble mean is shown in orange, with individual ensembles indicated by thin lines with different colors, while the model is shown as a blue line.**
